# Supplementary material for: Characteristics of minute T1 colorectal cancer in relevance to pathology and treatment
Source: PubMed Central journal article supplement — Ann Surg Treat Res. 2020 Mar 31;98(4):199–205. doi: 10.4174/astr.2020.98.4.199 (PMC7118321; doi:10.4174/astr.2020.98.4.199), 2020-03-31
Supplement: astr-98-199-s001.pdf [file astr-98-199-s001.pdf]

**Supplementary Table 1.** Clinicopathological characteristics of 20 patients with minute T1 colorectal cancer

| No. | Sex/age (yr) | Size (mm) | Tumor location | Endoscopic type | Risk factors                | Treatment | LNM |
|-----|--------------|-----------|----------------|-----------------|-----------------------------|-----------|-----|
| 1   | F/70         | 3.5       | Left           | Sessile         | No                          | ER        | (-) |
| 2   | M/66         | 4         | Right          | Sessile         | No                          | ER        | (-) |
| 3   | M/68         | 4         | Right          | Sessile         | SM                          | ER + SR   | (+) |
| 4   | M/63         | 4         | Left           | Sessile         | No                          | ER        | (-) |
| 5   | M/63         | 4         | Rectum         | Flat            | SM, BA, Other <sup>a)</sup> | ER + SR   | (-) |
| 6   | M/44         | 4         | Rectum         | Sessile         | SM, BA                      | ER        | (-) |
| 7   | M/41         | 5         | Rectum         | Sessile         | SM, BA                      | ER + SR   | (-) |
| 8   | M/50         | 5         | Left           | Sessile         | BA, Other <sup>a)</sup>     | ER + SR   | (-) |
| 9   | M/69         | 5         | Left           | Flat            | SM, BD, BA                  | ER + SR   | (+) |
| 10  | M/71         | 5         | Right          | Flat            | SM, VA, BA                  | ER + SR   | (-) |
| 11  | M/62         | 5         | Left           | Sessile         | SM                          | ER        | (-) |
| 12  | F/58         | 5         | Left           | Flat            | SM, BD, BA                  | ER + SR   | (-) |
| 13  | M/67         | 5         | Right          | Sessile         | SM, BA                      | ER + SR   | (-) |
| 14  | M/62         | 5         | Left           | Sessile         | SM, BA                      | ER + SR   | (+) |
| 15  | M/48         | 5         | Right          | Depressed       | SM, BA                      | ER        | (-) |
| 16  | F/62         | 5         | Left           | Flat            | No                          | ER        | (-) |
| 17  | F/77         | 5         | Rectum         | Sessile         | SM                          | ER + SR   | (-) |
| 18  | F/53         | 5         | Left           | Sessile         | Other <sup>a)</sup>         | ER + SR   | (+) |
| 19  | F/69         | 5         | Left           | Sessile         | No                          | ER        | (-) |
| 20  | M/83         | 5         | Right          | Sessile         | No                          | ER        | (-) |

LNM, lymph node metastasis; SM, deep submucosal invasion (sm2 or sm3); VA, vascular invasion; BD, tumor budding; BA, absence of background adenoma; ER, endoscopic resection; SR, surgical resection.

<sup>a)</sup>Other: positive resection margin.
